# Supplementary material
Source: MDPI journal article supplement (https://www.mdpi.com/search?q=cancers-11-01763)
Supplement: s001 [file cancers-11-01763-s001.pdf]

Supplementary Materials

# Antitumor Response and Immunomodulatory Effects of Sub-Microsecond Irreversible Electroporation and Its Combination with Calcium Electroporation

Vitalij Novickij, Robertas Čėsna, Emilija Perminaitė, Auksė Zinkevičienė, Dainius Characiejus, Jurij Novickij, Saulius Šatkauskas, Paulius Ruzgys and Irutė Girkontaitė

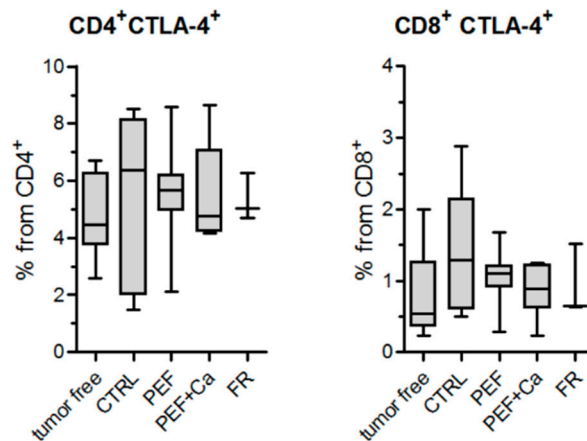

**Figure S1.** Flow cytometric analysis of CTLA expression on CD4 and CD8 T cells in spleen. Tumor free mice, CTRL (untreated and only CaCl<sub>2</sub> treated mice), PEF – PEF2 treated mice, PEF+Ca- PEF2 and CaCl<sub>2</sub> treated mice, FR (fully recovered). Gating strategy is presented in figure S3.

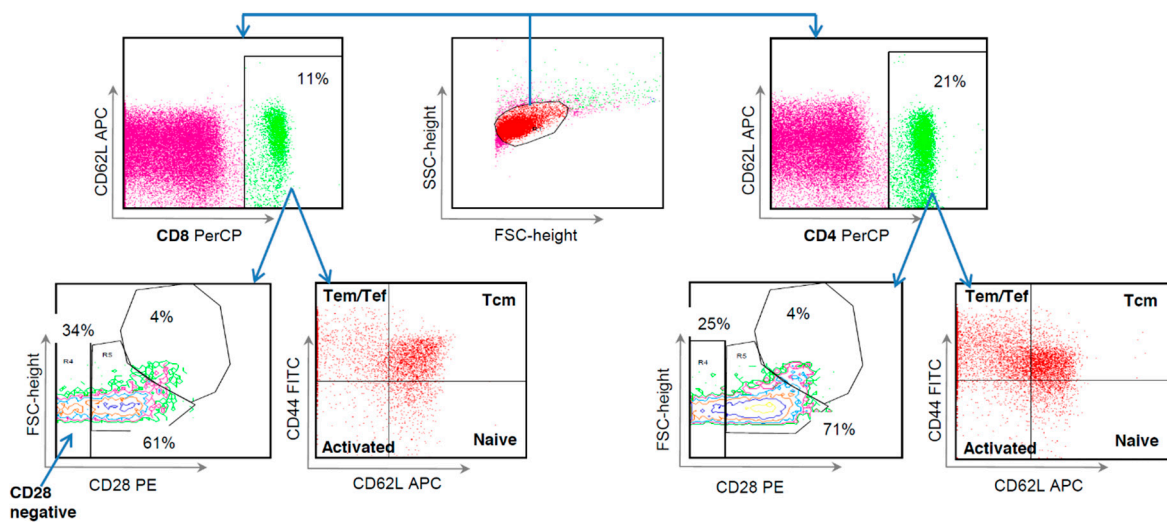

**Figure S2.** Gating strategy of CD28-negative, and Tem/Tef and Tcm CD4 and CD8 T cells. Splenocytes were stained with CD28-PE/ CD62L-APC/CD44-FITC in combination with CD4-PerCP or CD8-PerCP and analyzed by BD FACSCalibur and CellQuest software.

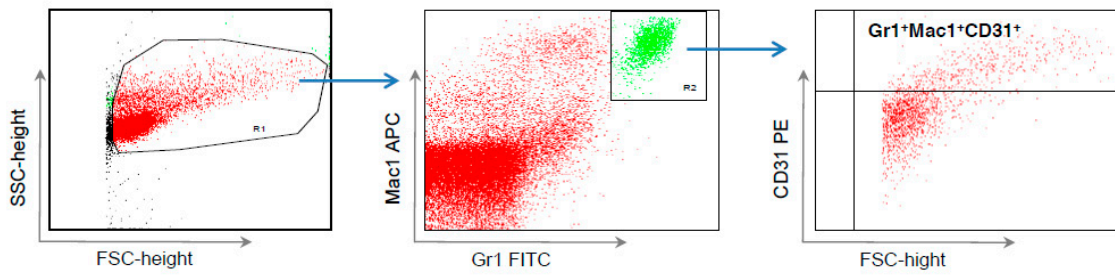

**Figure S3.** Gating strategy of myeloid suppressor Mac1+Gr1+CD31+ cells. Splenocytes were stained with Gr1-FITC/Mac1-APC/CD31-PE and analyzed by BD FACSCalibur and CellQuest software.

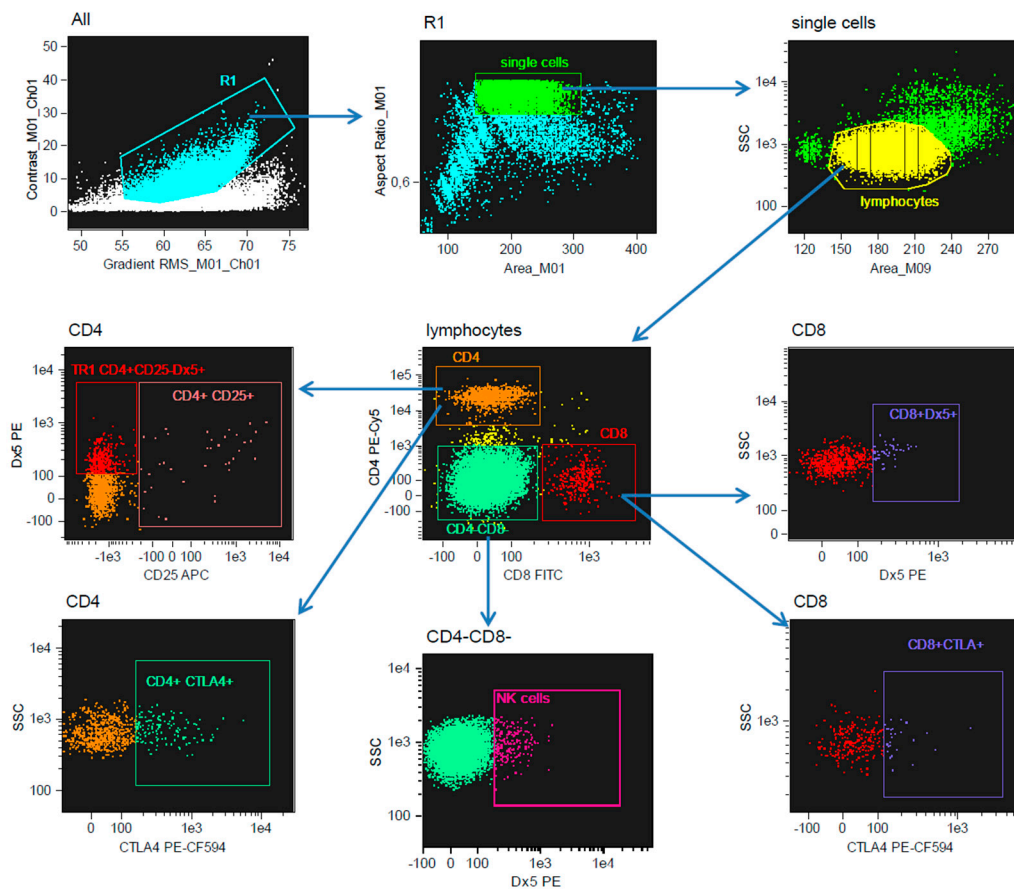

**Figure S4.** Gating strategy of CD4+CD25-Dx5+ (Tr1), CD4+CD25+, CD8+Dx5+, CD4+CTLA+, CD8+CTLA+ and NK cells. Splenocytes were stained with CD4-PE-Cy5/CD8-FITC/CD25-APC/Dx5-PE (for splenocytes) and CD4-PE-Cy5/CD8-FITC/CTLA4-PE-CF594 and analyzed by FlowSight (Amnis Millipore) cytometer and IDEAS software.

**Table S1.** Expression of CD28 on Tem/Tef and Tcm T cells.

|                                            | CD28 <sup>low</sup>     |                                      |                          | CD28 <sup>medium</sup>  |                                      |                      | CD28 <sup>high</sup>    |                                      |                          | CD28 <sup>low</sup>     |                                      |                      | CD28 <sup>medium</sup>  |                                      |                      | CD28 <sup>high</sup>    |                                      |                      |
|--------------------------------------------|-------------------------|--------------------------------------|--------------------------|-------------------------|--------------------------------------|----------------------|-------------------------|--------------------------------------|--------------------------|-------------------------|--------------------------------------|----------------------|-------------------------|--------------------------------------|----------------------|-------------------------|--------------------------------------|----------------------|
|                                            | % from CD4 <sup>+</sup> | CD44 <sup>+</sup> CD62L <sup>+</sup> | CD4 <sup>+</sup> Tem/Tef | % from CD4 <sup>+</sup> | CD44 <sup>+</sup> CD62L <sup>+</sup> | CD4 <sup>+</sup> Tcm | % from CD8 <sup>+</sup> | CD44 <sup>+</sup> CD62L <sup>+</sup> | CD8 <sup>+</sup> Tem/Tef | % from CD8 <sup>+</sup> | CD44 <sup>+</sup> CD62L <sup>+</sup> | CD8 <sup>+</sup> Tcm | % from CD8 <sup>+</sup> | CD44 <sup>+</sup> CD62L <sup>+</sup> | CD8 <sup>+</sup> Tcm | % from CD8 <sup>+</sup> | CD44 <sup>+</sup> CD62L <sup>+</sup> | CD8 <sup>+</sup> Tcm |
| <b>Spleen</b>                              |                         |                                      |                          |                         |                                      |                      |                         |                                      |                          |                         |                                      |                      |                         |                                      |                      |                         |                                      |                      |
| CTRL wt                                    | 25,5 ± 2,8              | 64,7 ± 4,7                           | 7,6 ± 1,9                | 20,9 ± 4,2              | 53,3 ± 7,1                           | 23,4 ± 5,7           | 15,9 ± 5,4              | 56,9 ± 6,2                           | 24,6 ± 9,9               | 31,1 ± 5,3              | 56,7 ± 3,9                           | 12,4 ± 3,5           |                         |                                      |                      |                         |                                      |                      |
| CTRL                                       | 24,9 ± 3,0              | 68,5 ± 5,0                           | 6,1 ± 1,9                | 17,1 ± 5,9              | 52,5 ± 3,2                           | 27,9 ± 6,2           | 14,2 ± 2,2              | 58,9 ± 5,3                           | 23,2 ± 2,9               | 30,2 ± 11,9             | 51,8 ± 3,3                           | 17,0 ± 12,1          |                         |                                      |                      |                         |                                      |                      |
| PEF2                                       | 22,8 ± 3,1              | <b>60,2 ± 5,2</b>                    | <b>10,9 ± 3,8</b>        | 19,4 ± 3,4              | 49,8 ± 2,9                           | 27,2 ± 3,5           | 14,8 ± 5,4              | 52,6 ± 7,6                           | 29,3 ± 11,0              | 32,8 ± 3,6              | 56,2 ± 4,6                           | 10,9 ± 2,8           |                         |                                      |                      |                         |                                      |                      |
| PEF2+Ca                                    | 22,7 ± 4,6              | 60,1 ± 4,5                           | <b>12,0 ± 6,4</b>        | 18,0 ± 3,0              | 40,7 ± 15,8                          | 30,6 ± 6,0           | 16,4 ± 5,9              | 55,0 ± 6,9                           | 26,0 ± 10,6              | 35,6 ± 6,9              | 51,3 ± 5,9                           | 12,8 ± 4,3           |                         |                                      |                      |                         |                                      |                      |
| <b>Lymph nodes</b>                         |                         |                                      |                          |                         |                                      |                      |                         |                                      |                          |                         |                                      |                      |                         |                                      |                      |                         |                                      |                      |
| CTRLwt                                     | 37,1 ± 6,3              | 57,8 ± 3,6                           | 4,4 ± 2,3                | 43,2 ± 9,9              | 51,7 ± 7,2                           | 5,0 ± 3,4            | 34,1 ± 5,9              | 61,0 ± 4,6                           | 4,7 ± 2,2                | 42,8 ± 6,1              | 56,9 ± 5,5                           | 1,2 ± 0,7            |                         |                                      |                      |                         |                                      |                      |
| CTRL                                       | 35,1 ± 8,5              | 62,4 ± 7,4                           | 2,6 ± 1,6                | 39,6 ± 14,8             | 57,7 ± 14,4                          | 3,4 ± 1,7            | 39,7 ± 14,5             | 57,2 ± 11,6                          | 3,3 ± 2,3                | 45,8 ± 15,3             | 54,3 ± 14,0                          | 1,2 ± 1,4            |                         |                                      |                      |                         |                                      |                      |
| PEF2                                       | 31,1 ± 9,5              | 58,0 ± 7,8                           | 9,3 ± 11,1               | <b>27,5 ± 11,9</b>      | 55,0 ± 15,3                          | 15,7 ± 21,9          | 36,1 ± 4,7              | 59,2 ± 4,1                           | 4,5 ± 4,2                | 39,0 ± 16,7             | 50,6 ± 13,3                          | 8,7 ± 20,8           |                         |                                      |                      |                         |                                      |                      |
| PEF2+Ca                                    | 32,1 ± 3,7              | 60,3 ± 3,1                           | 6,5 ± 5,6                | 32,3 ± 6,2              | 58,9 ± 3,9                           | 8,1 ± 5,3            | 36,8 ± 5,6              | 58,1 ± 5,2                           | 4,9 ± 2,4                | 41,6 ± 3,7              | 57,7 ± 2,3                           | 1,6 ± 1,4            |                         |                                      |                      |                         |                                      |                      |
| <b>Tumor infiltrated lymphocytes (TIL)</b> |                         |                                      |                          |                         |                                      |                      |                         |                                      |                          |                         |                                      |                      |                         |                                      |                      |                         |                                      |                      |
| CTRL                                       | 24,8 ± 2,9              | 71,3 ± 3,0                           | 4,2 ± 3,2                | 28,4 ± 14,6             | 59,1 ± 15,6                          | 11,5 ± 8,0           | 32,6 ± 4,6              | 66,4 ± 5,0                           | 1,9 ± 1,5                | 31,3 ± 1,4              | 53,1 ± 12,0                          | 15,6 ± 11,4          |                         |                                      |                      |                         |                                      |                      |
| PEF2                                       | 17,5 ± 8,0              | 64,2 ± 9,2                           | 5,1 ± 2,9                | 14,9 ± 12,2             | 60,3 ± 9,6                           | 18,0 ± 8,4           | <b>13,9 ± 13,4</b>      | 41,5 ± 33,0                          | <b>39,4 ± 42,7</b>       | <b>12,6 ± 12,7</b>      | 61,5 ± 12,5                          | 24,1 ± 18,5          |                         |                                      |                      |                         |                                      |                      |
| PEF2+Ca                                    | 21,6 ± 6,1              | <b>60,6 ± 6,2</b>                    | 7,2 ± 5,8                | <b>13,9 ± 7,5</b>       | 56,0 ± 13,1                          | 20,0 ± 11,1          | 16,6 ± 15,6             | 45,9 ± 21,8                          | <b>37,2 ± 37,3</b>       | <b>12,9 ± 17,0</b>      | 49,3 ± 10,8                          | 35,6 ± 22,4          |                         |                                      |                      |                         |                                      |                      |

Tef/Tem - T effector memory cells, Tcm - T central memory cells. Significant differences ( $p < 0.05$ ) between the mice groups according to Mann Whitney test are in bold, where red - significant versus CTRL wt; blue - significant versus CTRL. CTRL wt - untreated mice without tumors; CTRL - tumor bearing control mice without treatment; CTRL+Ca - tumor bearing mice treated with CaCl<sub>2</sub>; PEF1 and PEF2 - tumor bearing mice treated with PEF2 protocol -12 kV/cm × 500 ns × 500. PEF2+Ca - tumor-bearing mice treated with PEF2 and CaCl<sub>2</sub>.

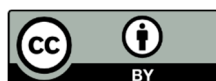

© 2019 by the authors. Licensee MDPI, Basel, Switzerland. This article is an open access article distributed under the terms and conditions of the Creative Commons Attribution (CC BY) license (<http://creativecommons.org/licenses/by/4.0/>).
